# Supplementary material for: Simulated binding of transcription factors to active and inactive regions folds human chromosomes into loops, rosettes and topological domains
Source: Oxford University Press journal article supplement (doi:10.1093/nar/gkw135), 2016-04-08
Supplement: gkw135_Supplementary_Data.zip [file gkw135_Supplementary_Data.zip]

Archive with 8 entries (8 files):
- nar-03391-h-2015-File011.avi
- nar-03391-h-2015-File012.avi
- nar-03391-h-2015-File008.pdf
- nar-03391-h-2015-File009.avi
- nar-03391-h-2015-File014.mp4
- nar-03391-h-2015-File013.mp4
- nar-03391-h-2015-File010.avi
- nar-03391-h-2015-File015.mp4
